# Supplementary material
Source: PubMed Central journal article supplement (PMC4640781)
Supplement: pnas.1512255112.sapp.pdf [file pnas.1512255112.sapp.pdf]

## SI Appendix

### SI Materials and Methods

**Plant material.** Plants of *Rhynchospora pubera* (Vahl) Boeckler, *R. tenuis* Link and *R. ciliata* (Vahl) Kükenthal were cultivated at humid conditions in a greenhouse. Additionally, leaf material from other Cyperaceae species (*Carex flacca* Schreb., *Cyperus aggregatus* (Willd.) Endl., *Scleria bracteata* Cav. and *Scirpoides holoschoenus* (L.) Soják) (SI Appendix, Table S3) was collected for DNA isolation.

**Somatic and meiotic meristem preparation.** Chromosome preparations for in situ hybridization analysis were conducted as described by Ruban, *et al.* (1), with modifications. First, young roots (pre-treated with 8-hydroxyquinolin for 24 h at 10°C) and anthers were fixed in ice-cold methanol for 30 min. After that the fixative was changed to ice-cold 3:1 (methanol:acetic acid) for 2 h. The fixed tissues were treated with an enzyme mixture (0.7% cellulase R10, 0.7% cellulase, 1.0% pectolyase, and 1.0% cytohelicase in 1× citric buffer) for 30 min at 37°C. Material was then washed in 1× citric buffer, twice in ice-cold water and fragmented in 7 µl of 60% freshly prepared acetic acid into smaller pieces with the help of a needle on a slide. After another 7 µl of 60% acetic acid was added, and the specimen was kept for 2 min at room temperature. Next, a homogenization step was performed with an additional 7 µl 60% acetic acid and the slide was placed on a 55°C hot plate for 2 min. The material was spread by hovering a needle over the drop without touching the hot slide. After spreading of cells, the drop was surrounded by 200 µl of ice-cold, freshly prepared 3:1 (ethanol:acetic acid) fixative. More fixative was added and the slide was briefly washed in fixative, then dipped in 60% acetic acid for 10 min and rinsed 5 times in 96% ethanol. A quality check of the air dried slides was performed by phase contrast microscopy. The slides were stored until use in 96% ethanol at 4°C. Chromosome preparations for immunolabelling analysis were made as described by Marques, *et al.* (2).

**Probe preparation and fluorescence *in situ* hybridization.** FISH probes were obtained as 5'-Cy3 or 5'-FAM-labeled oligonucleotides (Eurofins MWG Operon, <http://www.eurofinsdna.com>), or were PCR-amplified. All DNA probes, except oligonucleotides, were labelled with Cy3-, Texas Red- or Alexa 488-dUTP by nick translation, as described by Kato, Albert, Vega and Birchler (3). The sequences of all oligonucleotides and primers are listed in SI Appendix, Table S4. FISH was performed as described in Ma, *et al.* (4). Probes were then mixed with the hybridization mixture (50% formamide and 20% dextran sulfate in 2× SSC), dropped onto slides, covered with a cover slip and sealed. After denaturation on a heating plate at 80°C for 7 min, slides were hybridized at 37°C overnight. Post-hybridization washing was performed in 2× SSC for 20 min at 58°C. After dehydration in an ethanol series, 4',6-diamidino-2-phenylindole (DAPI) in Vectashield (Vector Laboratories, <http://www.vectorlabs.com>) was applied. Microscopic images were recorded using an Olympus BX61 microscope equipped with an ORCA-ER CCD and a deconvolution system. Images were analyzed using the SIS software (Olympus).

**PCR amplification of Tyba fragments.** Tyba fragments for probe labelling were amplified using gDNA from *R. pubera*, *R. tenuis* and *R. ciliata* for all members using the forward primer Tyba1F: CTAAGTCATTTTCATCACAATAATCTAC and the reverse primer Tyba1R: AATCCAGAAACGATTGAAATGCTC for Tyba1 and Tyba2F: GTGCAAATAATGCAATTCTGAGCATC and Tyba2R: ATATGCGTAATTACCATGTATAATCC for Tyba2. PCR reactions were performed in 25 µL reaction volume containing 100 ng of gDNA, 1 µM primers, 1× PCR buffer, 0.2 mM dNTPs, and 1 U of Taq polymerase (Qiagen). Thirty-five amplification cycles (45 s at 95°C, 45 s at 57 °C annealing temperature and 45 s at 72°C) were run.

**Expression analysis of Tyba and RpCENH3 by semi-quantitative RT-PCR.** Total DNase treated RNA was isolated from root, leaf and anther tissue of *R. pubera* using the Spectrum™ plant total RNA kit (Sigma) according to manufacturer's instructions. The cDNA was synthesized from 1µg of total RNA using the RevertAid First Strand cDNA Synthesis Kit (Thermo Scientific). PCR reactions were performed as described above. Primers sequences are listed in SI Appendix, Table S4, specific primers for the constitutively expressed GAPDH gene (5), GAPDH-F CAATGATAGCTGCACCACCAACTG and GAPDH-R CTAGCTGCCCTTCCACCTCTCCA, were used as control for equal amount of gDNA and cDNA. Amplified fragments of RpCENH3 were cloned into the StrataClone PCR Cloning Vector pSC-A-amp/kan (Agilent Technologies). Consensus sequences derived from sequencing of 10 randomly selected clones revealed two minor CENH3 variants which have been deposited in GenBank under accession numbers KR029618 and KR029619.

**RNAseq and *de novo* assembly for identification of CENH3 gene.** Total RNA was isolated from *R. pubera* pollen mother cells using the Spectrum™ plant total RNA kit (Sigma) according to manufacturer's instructions followed by cDNA library preparation. Final libraries were paired-end sequenced 2x100bp on Illumina HiSeq 2000. *De novo* assembly was performed using Velvet assembler (6), running a total of 87 million of paired-end reads, accession number PRJEB9645 at the Sequence Read Archive (<http://www.ebi.ac.uk/ena/>). Assembled contigs were finally submitted to a consensus assembly using Geneious assembler, Geneious version 7.1.7 [<http://www.geneious.com/>, (7)] producing 75,353 contigs. The Velvet assembly was performed using the Geneious provided plugin (Geneious v. 7.1.7). The assembly summary is shown on SI Appendix, Table S5.

**Generation of a CENH3 antibody.** The peptide ARTKHFSVRSKGKKSASRTK was used to generate a *R. pubera* CENH3-specific (RpCENH3) polyclonal antibody. Peptide synthesis, immunization of rabbits and peptide affinity purification of antisera was performed by LifeTein (<http://www.lifetein.com>).

**Preparation of extended fibers and immuno-FISH.** Extended DNA fibers were obtained by first isolating leaf nuclei according to Li, Yang, Tong, Zhao and Song (8). Briefly, nuclei were obtained by chopping leaves according to the following method: 100 mg of fresh young leaves were collected for the preparation of 5-10 slides, and leaves were chopped with a sharp sterile scalpel in a Petri dish that contained 1 ml of ice-cold nucleus isolation buffer (0.01 M MgSO<sub>4</sub>, 0.005 M KCl, 0.0005 M HEPES, 1 mg/ml dithiothreitol, and 0.25% Triton X-100) (9, 10). The materials obtained by chopping were filtered through 33- $\mu$ m nylon mesh, filtrates were centrifuged at high speed (16,000g) for 40 s, and the supernatant was discarded. The sediment was resuspended in 10  $\mu$ l of nucleus isolation buffer. DNA fibers were obtained by dropping 2  $\mu$ l of the suspension on one end of a coated slide and air dried for 5 to 10 min at room temperature. Thirty microliters of nucleus lysis buffer (0.5% sodium dodecylsulfate, 5 mM ethylenediaminetetraacetic acid, 100 mM Tris, pH7.0) was added to the nuclei and incubated at room temperature for 9 min. DNA fibers were dragged and extended with a clean coverslip followed by fixation in 4% paraformaldehyde for immuno-FISH.

Immuno-FISH on extended fibers and somatic cells was performed as described in Ishii, Sunamura, Matsumoto, Eltayeb and Tsujimoto (11). Finally, preparations were stained with DAPI/Vectashield (Vector Laboratories, Burlingame, CA, USA).

**Flow-sorting of nuclei for immuno-FISH signal overlapping quantification.** Young leaf tissue of *R. pubera* was fixed for 20 min under vacuum in 4% formaldehyde in Tris.Cl buffer (100 mM TRIS-HCl, pH 7, 5 mM MgCl<sub>2</sub>, 85 mM NaCl, 0.1% Triton X100), washed twice for 10 min in TRIS buffer and chopped with a sharp razor blade in about 1 ml of ice-cold nuclei

isolation buffer LB01 (12). Resulting suspension was filtered through a 35µm mesh and nuclei were stained with 4',6-diamidino-2-phenylindole (DAPI) (1 µg/ml) and flow-sorted using a FACSAria (BD Biosciences). 12 µl of sorted nuclei were mixed with equal amounts of sucrose buffer (100mM Tris, 50mM KCl, 2mM MgCl, 0.05% Tween-20, 5% sucrose) on slides. The slides were dried at room temperature and either used immediately or stored at -20°C until use.

**Super-resolution microscopy.** To analyze the structures and spatial arrangement of immunosignals and chromatin at a lateral optical resolution of ~120 nm (super-resolution, achieved with a 488 nm laser), 3D structured illumination microscopy (3D-SIM) was applied using a C-Apo 63x/1.2W Korr objective of an Elyra PS.1 microscope system and the software ZEN (Zeiss, Germany). Image stacks were captured separately for each fluorochrome using the 561, 488, and 405 nm laser lines for excitation and appropriate emission filters, and then merged using the ZEN software. The degree of co-localization between Tyba and CENH3 was measured in a single representative slice of each image stack and calculated by the ZEN software.

**Southern blot hybridization.** The Southern hybridization procedure was performed according to Sambrook, Fritsch and Maniatis (13) with modifications. Total genomic DNA was isolated from leaf tissue of *R. pubera*, *R. ciliata*, *R. tenuis*, *Carex flacca*, *Cyperus aggregatus*, *Scleria bracteata* and *Scirpoides holoschoenus*, using the DNeasy plant maxi kit (Qiagen) according to manufactures' instructions. The genomic DNAs of all species were further digested with the enzyme *DraI*, which recognize only one restriction site within the Tyba monomer, size-fractionated by 1.8% agarose gel electrophoresis and transferred to Hybond N+ nylon membranes (Amersham). Probes for Tyba 1 and Tyba 2 were prepared after PCR amplification from genomic DNA of *R. pubera* or *R. tenuis* and labelling by random primer with  $\alpha$ -<sup>32</sup>P-dATP (Thermo Scientific). Hybridization was done overnight at 65 °C in Church and Gilbert hybridization buffer and post-hybridization

washes carried out at 65 °C in 2× SSC, 0.5% SDS for 20 min followed by 1× SSC, 0.5% SDS at 65 °C for 20 min and 0.5× SSC, 0.5% SDS at 65 °C for 20 min for high stringency and 2× SSC, 0.5% SDS at 65 °C for 20 min followed by 1× SSC, 0.5% SDS at 65 °C for 20 min for low stringency, respectively.

**BAC library construction and screening.** Cell nuclei of *R. pubera* were isolated from young leaves following the protocol of Doležel, Číhalíková and Lucretti (14). Briefly, the leaves were fixed for 20 min in 2% (v/v) formaldehyde and immediately afterwards chopped by a razor blade in ice-cold isolation buffer (15). The suspension of released nuclei was stained by DAPI (2 µg/ml). The nuclei were purified by flow cytometry and used to prepare high-molecular-weight (HMW) DNA as described in Šimková, Číhalíková, Vrána, Lysák and Doležel (15). HMW DNA of 1.2 million nuclei of *R. pubera* (~4.2 µg DNA) were used to construct a large insert library. *Hind*III digested HMW DNA was cloned in pIndigoBAC-5 vector (Epicentre, Madison, WI, USA) as described in Šimková, *et al.* (16). The *R. pubera* BAC library is composed of 3,840 clones of 120 kb insert size, which cover 0.25x of *R. pubera* genome (2C = 3.3 pg).

Screening of BACs containing Tyba was carried out by hybridization with PCR-amplified Tyba probes using the procedure described in Ming, *et al.* (17). BACs showing a wide range of hybridization intensity were chosen for sequencing.

**Illumina HiSeq sequencing of genomic DNA and BACs.** Library preparation was carried out by using ~1 µg of genomic DNA or BAC-DNA. Following random shearing by ultra-sonication (Covaris S220; Covaris Inc.) fragmented DNA was end-repaired, adapter-ligated, barcoded and amplified as previously described by Meyer and Kircher (18). Adapter-ligated DNA was size-selected in a range of 400 – 500 bp for sequencing 2x100 bp on Illumina HiSeq2000. The original Illumina sequencing data for the genomic DNA and BACs are available under study accession number PRJEB9643 and PRJEB9649 at the Sequence Read Archive (<http://www.ebi.ac.uk/ena/>), respectively.

**Repeat identification and ChIP-seq analysis.** Identification and characterization of moderately to highly repeated genomic sequences was achieved by graph-based clustering (19) of genomic Illumina reads using RepeatExplorer pipeline (20). A total of 8 million reads (SI Appendix, Table S1), representing 3.6× genome coverage, were used for the clustering and 369 largest clusters with genome proportions of at least 0.01% were examined in detail. Clusters containing satellite repeats were identified based on the presence of tandem sub-repeats within their read or assembled contig sequences. These satellite repeats were characterized using oligomer frequency analysis of the reads within their clusters as described previously (21). To identify repeats associated with CENH3-containing chromatin, reads from the ChIP-seq experiment obtained by sequencing DNA from isolated chromatin prior to (the input control sample) and after immunoprecipitation with the CENH3 antibody (the ChIP sample) were separately mapped to the repeat clusters. The mapping was based on read similarities to contigs representing individual clusters, using BLASTn (22) with parameters "-m 8 -b 1 -e 1e-20 -W 9 -r 2 -q -3 -G 5 -E 2 -F F" and custom Perl scripts for parsing the results. Each read was mapped to a maximum of one cluster, based on its best similarity detected among the contigs. Ratio of ChIP/input reads assigned to individual clusters was then used to identify repeats enriched in the ChIP sample as compared to the input.

**CENH3-ChIP, ChIP-qPCR and ChIPseq.** Immunoprecipitation experiments were done as described in Kuhlmann and Mette (23). First, young leaves and buds were collected and cross-linked with formaldehyde 1% for 30 min on ice. Leaves and buds were then ground in liquid nitrogen and sonicated using a Diagenode Sonicator. Sonicated chromatin-DNA ranging from ~400-800 bp was immunoprecipitated using anti-RpCENH3. To verify the quality of our IP-DNA we have performed real-time quantitative PCR using Tyba primers as putative positive markers and the 26S ribosomal primers (SI Appendix, Table S4) as negative control in three different samples: input chromatin isolated DNA, immunoprecipitated DNA and no antibody control (noAB).

Immunoprecipitated DNA and input samples (3-7ng for each sample) were used for library preparation following manufacturer's recommendations (Illumina TruSeq ChIP Sample Preparation Kit #IP-202-1012). Subsequently, prepared libraries were paired-end sequenced 2x100bp on Illumina HiSeq 2000. The original ChIPseq sample data are available under study accession number PRJEB9647 at the Sequence Read Archive (<http://www.ebi.ac.uk/ena/>).

**BAC assembly and annotation.** Seven positive clones from the *R. pubera* library were sequenced, producing millions of HiSeq paired-end reads (100bp, with >500x coverage). Next, reads were assembled using MIRA (24) and Velvet (6) assemblers. Contigs obtained from both assemblers were then submitted to several rounds of assembly using the Geneious assembler (Geneious v. 7.1.7) and manually edited. Contigs best-matching the estimated BAC length as measured by pulse-field-gel-electrophoresis (PFGE) were then used for annotation. For quantification and annotation of repetitive sequences we performed clustering analysis on RepeatExplorer on each batch of BAC paired-end reads. This approach helped mainly in the correct quantification and annotation of transposable elements and Tyba arrays. In parallel, Phobos, a tandem repeat search tool (Phobos 3.3.11, 2006-2010, [http://www.rub.de/spezzoo/cm/cm\\_phobos.htm](http://www.rub.de/spezzoo/cm/cm_phobos.htm)), was used for correct localization and annotation of Tyba arrays. Phobos was also used for the identification of Tyba high order repeat structures. Coding sequences were identified using the gene prediction tools Augustus and Glimmer and manually annotated by BLAST searches. All the analyses were performed inside Geneious v. 7.1.7 with the provided plugins, except for the clustering analyses. BAC annotation is described in SI Appendix, Table S2. To infer whether coding sequences presents in the BACs are transcriptionally active we isolated and blasted each individual predicted coding sequence against our PMC transcriptome database. Assembled BAC sequences are available through iPlant Data Store and can be accessed via iPlant Discovery Environment or at [http://de.iplantcollaborative.org/dl/d/8258A143-C5F5-4DF1-84F2-88C94BE8EA8F/R\\_pubera\\_holocentromeres\\_data.rar](http://de.iplantcollaborative.org/dl/d/8258A143-C5F5-4DF1-84F2-88C94BE8EA8F/R_pubera_holocentromeres_data.rar)).



**Phylogenetic analysis.** Reference IDs for all CENH3 sequences used in this study are available in SI Appendix, Table S6. Multiple alignment of protein sequences encoding the entire CENH3 sequences was generated using MUSCLE (25) and refined manually. Evolutionary analyses were conducted with IQ-TREE (26) using ultrafast bootstrap (27). Phylogenetic history was inferred using the Maximum Likelihood method. The analysis involved 113 protein sequences. All positions containing gaps and missing data were eliminated. There were a total of 101 positions in the final dataset. Phylogenetic analysis of CRRh was done as previously and using the same alignment matrix from Neumann, *et al.* (28).

Supplementary Figures

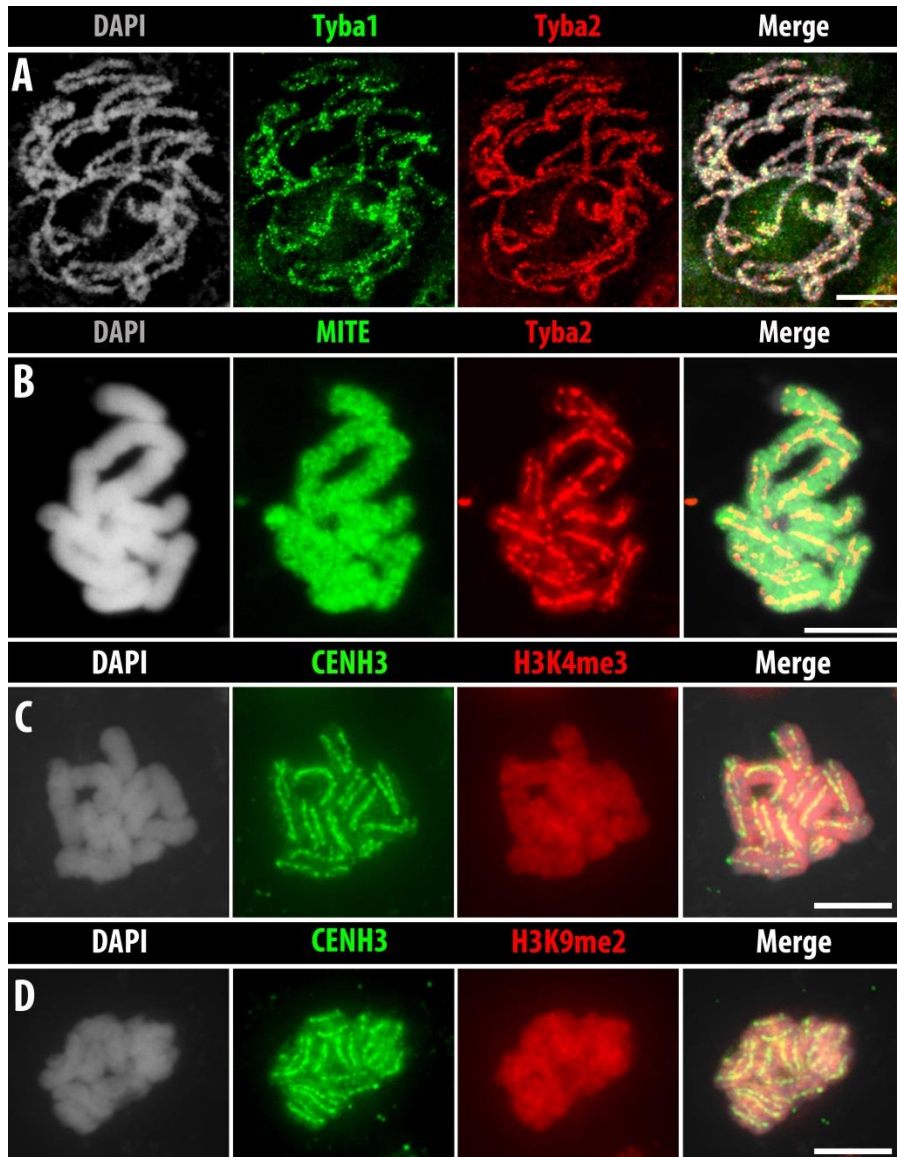

**Fig. S1.** Overall chromosomal chromatin organization in *R. pubera*. **(A-B)** FISH localization of Tyba and MITE repeats in *R. pubera* chromosomes. **(A)** Hybridization signals of both Tyba members in prophase chromosomes showing a line-like labeling on the poleward surface of each chromatid. **(B)** MITE signals are dispersed while Tyba2 displays a holocentromere-like pattern in metaphase chromosomes. **(C-D)** Metaphase chromosomes of *R. pubera* immunostained with antibodies recognizing H3K4me3 **(C)** and H3K9me2 **(D)** histone modifications in combination with anti-CENH3. Note, the disperse distribution of both H3 modifications. Scale bars: 5  $\mu$ m.

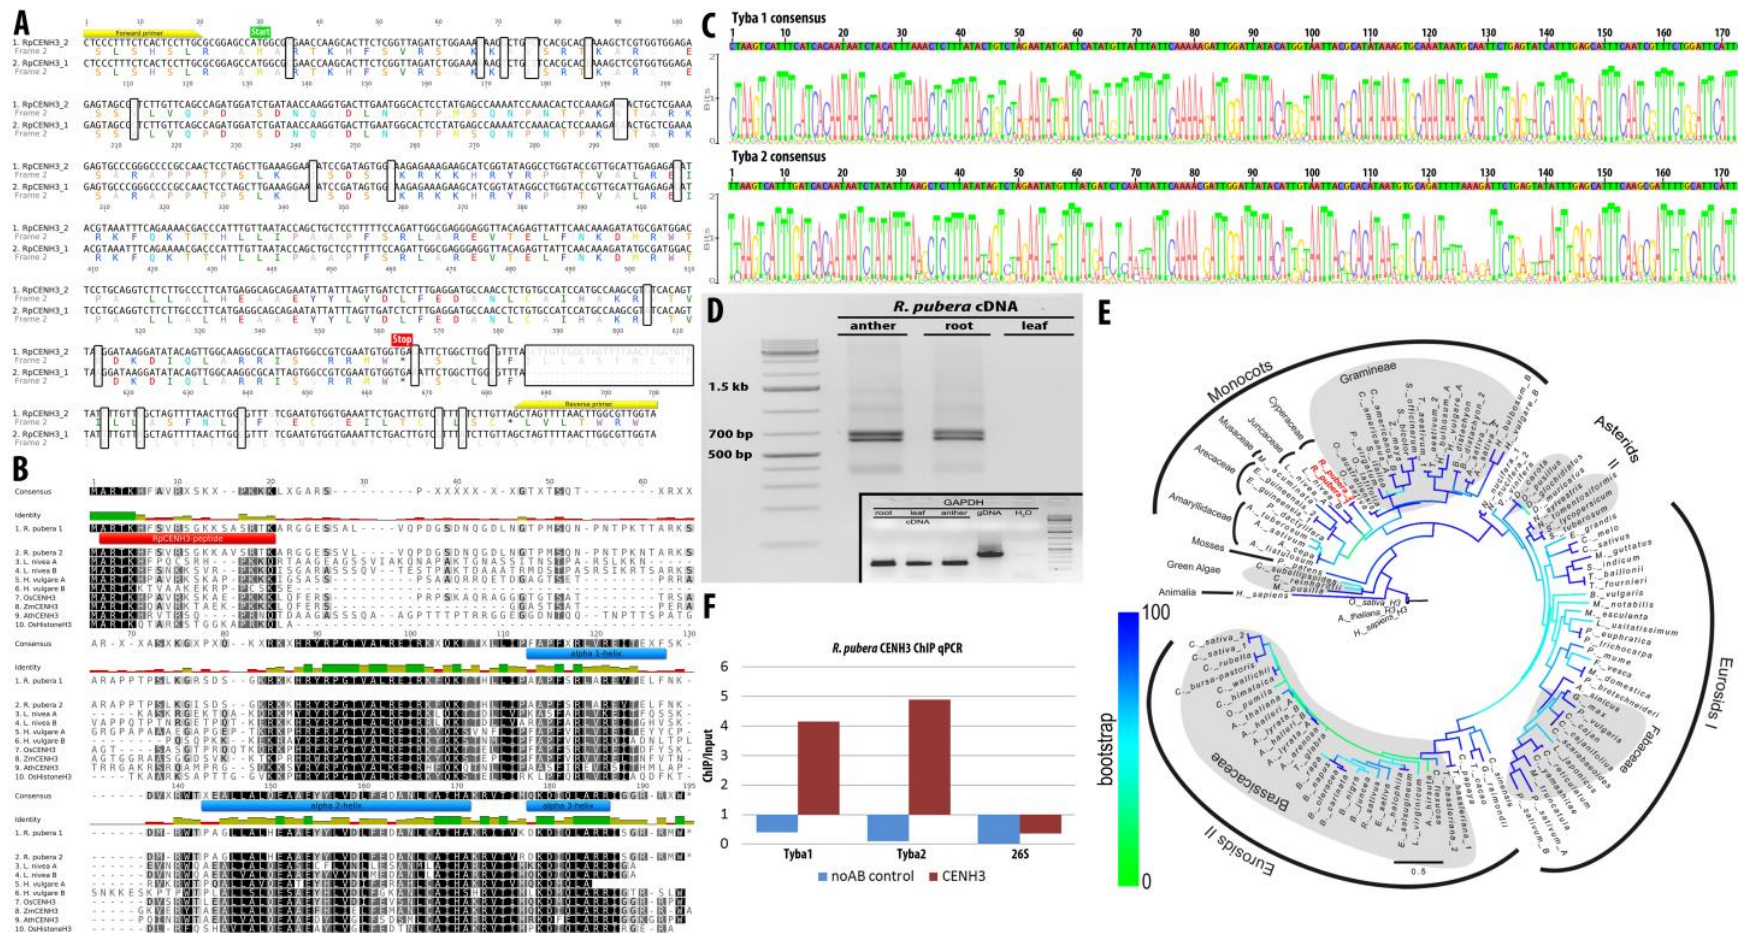

**Fig. S2.** CENH3 sequence characterization, Tyba monomer reconstruction and CENH3-ChIP analysis. **(A)** DNA and amino acid alignment of *R. pubera* CENH3 variants. Yellow boxes indicate the primer-binding sites used to amplify the fragments; green and red boxes indicate start and stop codons, respectively. Nucleotide disagreements between the variants are high-lightened by black-lined boxes. **(B)** Amino acid alignment of *R. pubera* CENH3 variants and other plant

CENH3 sequences. Red box and blue boxes indicate the amino acid residues used for generation of anti-RpCENH3 and histone alpha helix fold domains, respectively. **(C)** Monomer reconstruction of Tyba1 and Tyba2 using base frequency logo representation. **(D)** RT-PCR analysis of RpCENH3s in different tissues. **(E)** Analysis of evolutionary divergence in plant CENH3 sequences. The evolutionary history was inferred by using the Maximum Likelihood method based on the LG matrix-based model (79). The tree with the highest log likelihood (-5988.401) is shown. The tree is drawn to scale, with branch lengths measured in the number of substitutions per site. **(F)** Quantitative real-time PCR of *R. pubera* CENH3-ChIP using Tyba1 and 2 specific primers. As negative control we used a set of primers to specifically amplify a short region of the 26S ribosomal RNA gene. No antibody control (noAB) was used as a negative control for amplification.





groove (arrowheads). **(A-B)** SIM images. Scale bar: 5 $\mu$ m. **(D)** Southern blot hybridization of different *Rhynchospora* species (*R. ciliata*, *R. pubera* and *R. tenuis*) and other genera of Cyperaceae (*Cyperus aggregatus*, *Scleria bracteata*, *Scirpoides holoschoenus* and *Carex flacca*) with Tyba1 repeat amplified from *R. tenuis*. Numbers 1-4 on top represent different enzyme concentrations (0.3 U, 0.6 U, 1U and 5U of *DraI*, respectively). **(E-F)** Immuno-FISH colocalization of both CENH3 and Tyba in metaphase chromosomes of *Rhynchospora* species, SIM images of *R. tenuis* (2n = 4) **(E)** and of *R. ciliata* (2n = 10) **(F)** (scale bar: 5  $\mu$ m). **(G)** Semi-quantitative RT-PCR reveals the transcriptional activity of Tyba1 and 2 in all tissues analyzed. GAPDH was used as control. **(H)** Annotation of *R. pubera* BACs containing centromeric repeats. RpBAC9H8 shows a ~3 kb Tyba array very close to the protein domain region of a Pararetrovirus, as well as a hAT DNA transposon, a Ty3/gypsy LTR retrotransposon of Ogre/Tat clade, other TE related proteins and single copy coding sequences. RpBAC8P1 shows a ~10 kb Tyba array flanked on both sides by MITE-like sequences with a centromeric retrotransposon on the neighborhood, a Ty1/copia LTR retrotransposon of Maximus/SIRE clade, a Ty3/gypsy LTR retrotransposon of Ogre/Tat clade, and other single copy coding sequences. RpBAC23M1 shows a ~17 kb Tyba array, a putative LTR-related region with a Tyba-like insertion and other single copy coding sequences. RpBAC3H4 shows a ~16 kb Tyba array, a MuDR-like DNA transposon, a Ty3/gypsy LTR retrotransposon of Athila clade and additional single copy coding sequences. RpBAC22N8 shows a ~12 kb Tyba array, a Ty3/gypsy LTR retrotransposon of Athila clade and additional single copy coding sequences. RpBAC23H8 shows a ~12 kb Tyba array with an apparently degenerated region and additional single copy coding sequences.

**A**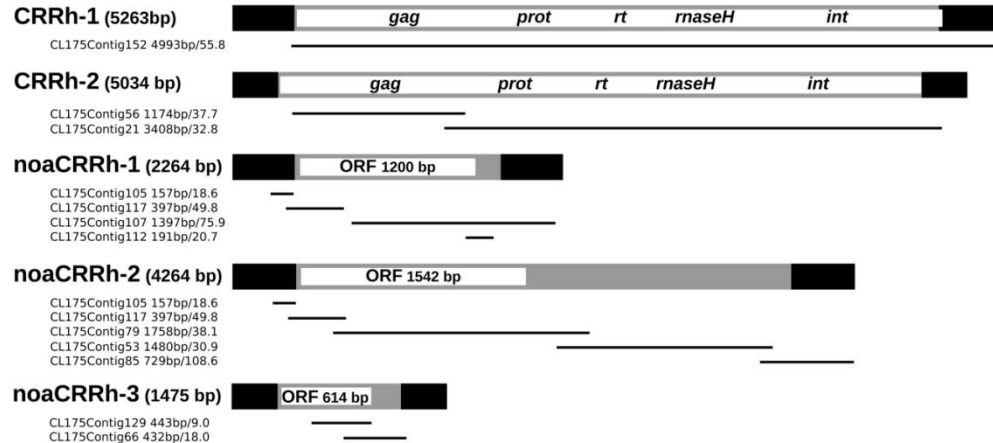**B**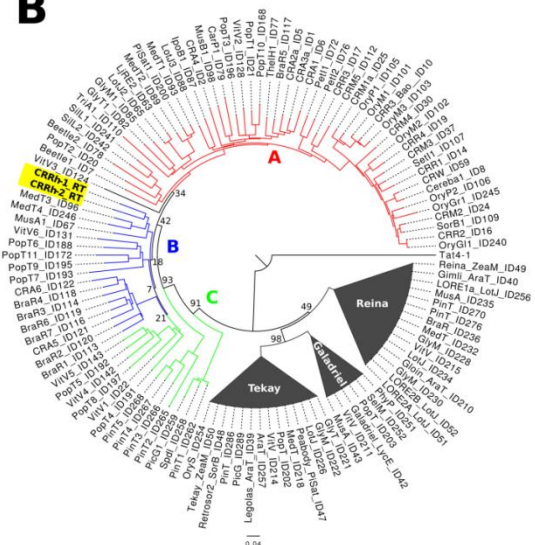**C**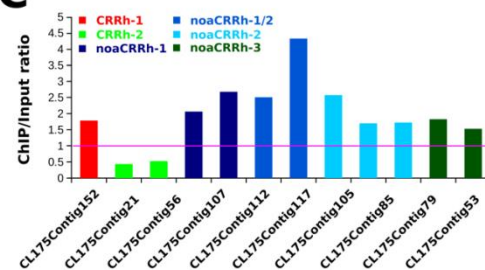**D**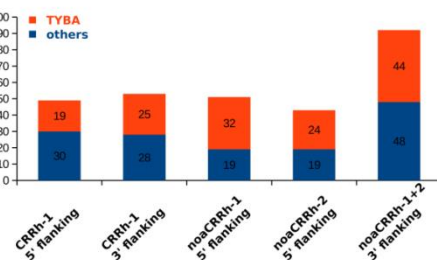**E**

CRRh-1      GPFCILQRIINDNAYKVELPANYGVSTTFNVKDLISLYHG--DNEL-----NSGTSYRAAEANDTVRATSDAD\*  
 CRRh-2      GPFLVLERINDNAYKVDLPGEYVSGTFNVADLSPIYDSEKETSSEAEDEVTSRITLFLRGG\*  
 MedT3\_ID96    GPFLVQIKINDNAYKVELPQTYGVSATFNVADLSPIYLD--DELD-----INRSTSTQPGENDAQEIHRT\*  
 MusA1\_ID67    GPFLVLRINDNAYEIELPQDYGVSTFNVADLSPIYSHVDESNI-----EQLRSLIQPEIDTGVSNLLQSDYMSLDYDLVFSVNNAS\*  
 CRA5\_ID121    GPFLVLERINDNAYKVELPCHLRISNVFNKYLSPFRG--DNEV-----VQSSSPLPPEET\*  
 CRA6\_ID122    GPFLVLERINDNAYRLLPPEHIRTSDVFNVRYLSKYHV--ENDV-----PQSEALLPQENCASLYLYSVFNLLGLLFSISLLLLTWTALSYVLVGSFQTC\*  
 BraR1\_ID113    GPFLVLERINDNAYRQLPAHINTSDVFNVRYLSPIYFP--PDQV-----HDSGSLSNPEGPDAAA\*  
 BraR2\_ID120    GPFLVLSKINDNAYRVELPSDITTSDFVFNRYLSPIYKS--PDVQ-----SDRSPPPHGGPDAASSPSAAT\*  
 BraR3\_ID114    GPFLVLRINDNAYRVELPSHSHHADVFNVRYLSPFRG--DNEV-----SDFVDESSVGGT\*  
 BraR4\_ID118    GPFLVLERINDNAYRQLPQPHVNTSDVFNVRYLSKYRG--DNEI-----PDSGTLILLPGET\*  
 BraR6\_ID119    DPVVEIERINDNAYRRLPSSLRISDFVFNKHLSPYHG--DNDD-----PDSWMLPNQGGDAAPPVIVHDHSSLSN\*  
 BraR7\_ID116    GPVVEVLERINDNAYRVLPAHLRISDFVFNKHLSPYKGG--DNDD-----PDSWMLPNQGGPDAAA\*  
 PopT7\_ID193    RPFKVKLRINDNAYVLDPNMSISKTFNVADLSPIYMP--EGNLY-----DRSGASFL\*  
 PopT9\_ID194    NPFDLQKINDNAYVADLPENTISPTFNVADLSPIYMP--PDECPSHLIN-AGRSVQERETDVG\*  
 PopT11\_ID172    GPFDIQKINDNAYIVDLPADMAISSTFNVTIYVEYMP--PDVLSHSI--THSRSSSFTQRLM\*  
 VitV6\_ID131    GPFCILQKIEDNAYKINFLADNINFAFNVTIDFEYFS--PDEFSL\*-----THSRSSSFTQRLM\*

LTR  
 →



**Fig. S4.** Features of CRRh elements of *R. pubera*. **(A)** Schematics of CRRh elements. LTRs are shown in black, internal fragments in gray and ORF in white. Lines below the schemes show positions of the most representative contigs that were used to reconstruct sequences of full length elements. **(B)** Neighbor-joining tree inferred from a comparison of RT domain sequences. It demonstrates that CRRh-1 and CRRh-2 elements belong to CRM clade of chromoviruses, being most similar to those that form the group B. Classification of CRM into groups A, B, and C is based on differences at the C-terminus of integrase (3). The non-chromovirus element Tat4-1 was used as an outgroup, while members of the Tekay, Reina, and Galadriel clades were included as representatives of non-CRM clade chromoviruses. **(C)** A chart showing ChIP-enrichment calculated for contigs representing fragments of different CRRh elements. **(D)** Analysis of insertion sites sequences of CRRh elements revealed that CRRh-1, noaCRRh-1 and noaCRRh-2 integrates frequently into Tyba. Sequences at insertion sites of CRRh-2 and noaCRRh-3 could not be analyzed because LTR sequences were variable and shared similarity with other repeats. **(E)** Alignment of sequences at the C-terminus of integrase. Only sequences from CRM group B elements are included (3). Characteristic feature of this group of CRM elements is the absence of PTD domain at integrase C-terminus and termination of the coding region around the start of 3' LTR (3). This is in contrast to CRM group A elements having the coding region extended deeply into 3' LTR and encoding for PTD domain (3). Stop codons at the end of each open reading frame are indicated by red asterisks. Beginning of 3' LTR is depicted as an arrow above the alignment. Arrow shows a part of integrase which is encoded by sequence in the 3' LTR. RT-domain sequences used for the phylogenetic analysis were obtained from the study of (3).

## Supplementary Tables

**Table S1.** Repetitive DNA composition of the *R. pubera* genome

|                          |              |              | Analyzed reads: 8,032,451 |             |
|--------------------------|--------------|--------------|---------------------------|-------------|
| Repeat class             | Subclass     | Family       | Genome [%]                | (group sum) |
|                          |              |              |                           | 17.13       |
| LTR retrotransposons     | Ty1/copia    | Angela       | 5.79                      |             |
|                          |              | Maximus      | 1.17                      |             |
|                          |              | Alell        | 0.91                      |             |
|                          |              | Tork         | 0.21                      | 8.68        |
|                          |              | TAR          | 0.20                      |             |
|                          |              | Bianca       | 0.19                      |             |
|                          |              | Ivana        | 0.19                      |             |
|                          | Alel         | 0.01         |                           |             |
|                          | Ty3/gypsy    | Athila       | 2.54                      |             |
|                          |              | Tat/Ogre     | 1.86                      | 5.14        |
| chromovirus              |              | 0.74         |                           |             |
|                          | unclassified |              | 3.32                      |             |
| Non-LTR retrotransposons | LINE         |              | 0.55                      | 0.72        |
|                          | SINE         |              | 0.17                      |             |
| Pararetrovirus           |              |              | 0.51                      |             |
| DNA transposons          | MITE         |              | 5.10                      | 8.81        |
|                          | hAT          |              | 0.84                      |             |
|                          |              | unclassified |                           | 2.87        |

|                             |       |
|-----------------------------|-------|
| Helitron                    | 0.59  |
| TEs unclassified            | 2.69  |
| Others                      |       |
| Satellite DNA               | 3.60  |
| rDNA                        | 0.70  |
| Classified repeats          | 34.75 |
| Total repeats $\geq 0.01\%$ | 41.16 |

**Table S2.** BAC annotation

| <b>RpBAC3H4</b>                                            |                                          |            |          |        |
|------------------------------------------------------------|------------------------------------------|------------|----------|--------|
| Name                                                       | Type                                     | Start base | End base | Length |
| not annotated                                              | gene                                     | 2,138      | 3,256    | 1,119  |
| Translational activator GCN1                               | gene                                     | 63,575     | 87,529   | 23,955 |
| Putative LRR receptor-like serine/threonine-protein kinase | gene                                     | 122,120    | 133,775  | 11,656 |
| not annotated                                              | gene                                     | 143,214    | 144,067  | 854    |
| ATP synthase protein I-related protein                     | gene                                     | 156,388    | 160,107  | 3,720  |
| polyadenylate binding protein                              | gene                                     | 165,600    | 171,622  | 6,023  |
| CMP-KDO synthetase                                         | gene                                     | 177,295    | 185,236  | 7,942  |
| Ty3/gypsy Athila                                           | LTR retrotransposon transposable element | 91,290     | 99,919   | 8,630  |
| putative DNA transposon - MuDR                             | protein                                  | 35,290     | 40,298   | 5,009  |
| Tyba                                                       | Tyba_array                               | 13,333     | 28,723   | 15,391 |
| 862-nucleotide Repeat (Tyba HOR pentamer)                  | Tyba_array                               | 14,456     | 16,813   | 2,358  |
| 844-nucleotide Repeat (Tyba HOR pentamer)                  | Tyba_array                               | 19,976     | 22,426   | 2,451  |
| 862-nucleotide Repeat (Tyba HOR pentamer)                  | Tyba_array                               | 23,488     | 25,286   | 1,799  |
| 863-nucleotide Repeat (Tyba HOR pentamer)                  | Tyba_array                               | 26,126     | 28,113   | 1,988  |
| Total length (kb) obtained in the assembly                 |                                          |            |          | 187    |

Total length (kb) obtained by PFGE

140

---

**RpBAC8P1**

---

| Name                                      | Type                | Start<br>base | End base | Length |
|-------------------------------------------|---------------------|---------------|----------|--------|
| UDP-glucosyltransferase                   | gene                | 37,320        | 38,735   | 1,416  |
| virus-like coat protein                   | gene                | 84,288        | 85,301   | 1,014  |
| LTR Ty1/copia Maximus/SIRE                | LTR retrotransposon | 11,053        | 16,873   | 5,821  |
| LTR                                       | LTR retrotransposon | 18,270        | 19,178   | 909    |
| LTR Ty3/gypsy Ogre/Tat                    | LTR retrotransposon | 49,742        | 54,452   | 4,711  |
| CR - chromovirus from CRM clade           | LTR retrotransposon | 95,761        | 101,062  | 5,302  |
| putative MITE                             | MITE                | 65,171        | 66,805   | 1,635  |
| putative MITE                             | MITE                | 76,391        | 77,519   | 1,129  |
| Tyba                                      | Tyba_array          | 66,822        | 76,329   | 9,508  |
| 334-nucleotide Repeat (Tyba HOR dimer)    | Tyba_array          | 67,857        | 69,106   | 1,250  |
| 837-nucleotide Repeat (Tyba HOR pentamer) | Tyba_array          | 70,311        | 72,011   | 1,701  |
| 843-nucleotide Repeat (Tyba HOR pentamer) | Tyba_array          | 72,000        | 75,112   | 3,113  |

---

Total length (kb) obtained in the assembly

101

Total length (kb) obtained by PFGE

110

---

**RpBAC9H8**

---

| Name                       | Type | Start<br>base | End base | Length |
|----------------------------|------|---------------|----------|--------|
| Peptidase Gluzincin family | gene | 33,747        | 38,766   | 5,020  |

|                                            |                      |         |         |        |
|--------------------------------------------|----------------------|---------|---------|--------|
| DYW family of nucleic acid deaminases      | gene                 | 122,112 | 128,542 | 6,431  |
| LTR                                        | LTR retrotransposon  | 5,126   | 6,494   | 1,369  |
| Ty3/gypsy Ogre/Tat                         | LTR retrotransposon  | 68,135  | 82,856  | 14,722 |
| Ty3/gypsy GAG                              | LTR retrotransposon  | 94,476  | 95,861  | 1,386  |
| RT domain                                  | LTR retrotransposon  | 116,924 | 118,979 | 2,056  |
| Pararetrovirus                             | Pararetrovirus       | 15,855  | 21,257  | 5,403  |
|                                            | transposable element |         |         |        |
| hAT DNA Transposon                         | protein              | 42,447  | 45,458  | 3,012  |
|                                            | transposable element |         |         |        |
| Plant mobile domain - transposase          | protein              | 84,413  | 93,547  | 9,135  |
| Tyba                                       | Tyba_array           | 6,473   | 9,853   | 3,381  |
| 851-nucleotide Repeat (Tyba HOR pentamer)  | Tyba_array           | 6,473   | 9,853   | 3,381  |
| Total length (kb) obtained in the assembly |                      |         |         | 128    |
| Total length (kb) obtained by PFGE         |                      |         |         | 140    |

---

### RpBAC17C8

---

| Name                              | Type                | Start base | End base | Length |
|-----------------------------------|---------------------|------------|----------|--------|
| YTH domain family protein 2       | gene                | <1         | 5,601    | >5601  |
| glucose-6-phosphate dehydrogenase | gene                | 7,692      | 22,403   | 14,712 |
| putative LINE protein             | LINE                | 22,544     | 26,598   | 4,055  |
| LINE                              | LINE                | 67,335     | 101,028  | 33,694 |
| retrotransposon sequence          | LTR retrotransposon | 26,738     | 28,937   | 2,200  |

|                                            |                      |         |         |        |
|--------------------------------------------|----------------------|---------|---------|--------|
| Tekay-chromovirus-related                  | LTR retrotransposon  | 50,272  | 58,624  | 8,353  |
| LTR Ty1/copia Angela                       | LTR retrotransposon  | 105,313 | 108,382 | 3,070  |
|                                            | transposable element |         |         |        |
| TE protein - endoribonuclease              | protein              | 67,335  | 82,808  | 15,474 |
|                                            | transposable element |         |         |        |
| RT domain                                  | protein              | 85,380  | 89,144  | 3,765  |
|                                            | transposable element |         |         |        |
| GAG domain                                 | protein              | 89,519  | 91,219  | 1,701  |
|                                            | transposable element |         |         |        |
| TE protein                                 | protein              | 92,671  | 101,028 | 8,358  |
| Tyba                                       | Tyba_array           | 29,272  | 32,400  | 3,129  |
| Tyba                                       | Tyba_array           | 33,983  | 36,060  | 2,078  |
| Tyba                                       | Tyba_array           | 38,483  | 41,922  | 3,440  |
| 862-nucleotide Repeat (Tyba HOR pentamer)  | Tyba_array           | 29,281  | 32,353  | 3,073  |
| 870-nucleotide Repeat (Tyba HOR pentamer)  | Tyba_array           | 34,002  | 35,967  | 1,966  |
| 837-nucleotide Repeat (Tyba HOR pentamer)  | Tyba_array           | 38,511  | 41,887  | 3,377  |
| Total length (kb) obtained in the assembly |                      |         |         | 108    |
| Total length (kb) obtained by PFGE         |                      |         |         | 120    |

---

### RpBAC22N8

---

| Name                                                | Type | Start base | End base | Length |
|-----------------------------------------------------|------|------------|----------|--------|
| Myb/SANT-like DNA-binding domain-containing protein | gene | 55,932     | 57,708   | 1,777  |

|                                            |                     |        |        |        |
|--------------------------------------------|---------------------|--------|--------|--------|
| Borrelia P83/100 protein                   | gene                | 66,313 | 69,706 | 3,394  |
| helicase                                   | gene                | 72,958 | 75,765 | 2,808  |
| auxin response factor 4-like               | gene                | 88,036 | 89,341 | 1,306  |
| LTR Ty3/gypsy Athila                       | LTR retrotransposon | 11,254 | 22,129 | 10,876 |
| Tyba                                       | Tyba_array          | 41,857 | 53,749 | 11,893 |
| 860-nucleotide Repeat (Tyba HOR pentamer)  | Tyba_array          | 41,977 | 53,539 | 11,563 |
| Total length (kb) obtained in the assembly |                     |        |        | 89     |
| Total length (kb) obtained by PFGE         |                     |        |        | 90     |

---

### RpBAC23H8

---

| Name                                             | Type       | Start base | End base | Length |
|--------------------------------------------------|------------|------------|----------|--------|
| protein ROOT PRIMORDIUM DEFECTIVE 1 isoform X2   | gene       | 1          | 13,987   | 13,987 |
| BTB/POZ and TAZ domain-containing protein 1-like | gene       | 14,836     | 15,883   | 1,048  |
| zinc finger BED domain-containing protein        | gene       | 35,222     | 40,847   | 5,626  |
| ribosomal protein L2                             | gene       | 47,828     | 49,201   | 1,374  |
| TAZ zinc finger                                  | gene       | 52,087     | 54,622   | 2,536  |
| rRNA-processing protein EFG1-like                | gene       | 62,711     | 66,483   | 3,773  |
| Peptide methionine sulfoxide reductase           | gene       | 85,345     | 94,589   | 9,245  |
| Tyba                                             | Tyba_array | 71,297     | 75,867   | 4,571  |
| Tyba                                             | Tyba_array | 76,479     | 77,066   | 588    |
| Tyba                                             | Tyba_array | 77,622     | 78,096   | 475    |



|                                            |            |        |        |       |
|--------------------------------------------|------------|--------|--------|-------|
| Tyba                                       | Tyba_array | 78,945 | 83,144 | 4,200 |
| 858-nucleotide Repeat (Tyba HOR pentamer)  | Tyba_array | 71,313 | 75,859 | 4,547 |
| 172-nucleotide Repeat (Tyba monomer)       | Tyba_array | 76,483 | 77,060 | 578   |
| 170-nucleotide Repeat (Tyba monomer)       | Tyba_array | 77,631 | 78,084 | 454   |
| 860-nucleotide Repeat (Tyba HOR pentamer)  | Tyba_array | 78,971 | 83,055 | 4,085 |
| Total length (kb) obtained in the assembly |            |        |        | 97    |
| Total length (kb) obtained by PFGE         |            |        |        | 110   |

### RpBAC23M1

| Name                                      | Type          | Start base | End base | Length |
|-------------------------------------------|---------------|------------|----------|--------|
| hAT family dimerisation protein kinase    | gene          | 1,423      | 1,854    | 432    |
| uncharacterized protein                   | gene          | 17,963     | 21,750   | 3,788  |
| LINE                                      | LINE          | 57,436     | 61,561   | 4,126  |
| LTR retrotransposon-like                  | LTR           | 45,783     | 51,849   | 6,067  |
| 367-nucleotide Repeat (Tyba-like dimer)   | repeat_region | 6,368      | 8,900    | 2,533  |
| Tyba                                      | Tyba_array    | 6,632      | 7,370    | 739    |
| 362-nucleotide Repeat (Tyba HOR dimer)    | Tyba_array    | 23,918     | 40,387   | 16,470 |
| 869-nucleotide Repeat (Tyba HOR pentamer) | Tyba_array    | 24,009     | 25,718   | 1,710  |
| 364-nucleotide Repeat (Tyba HOR dimer)    | Tyba_array    | 26,047     | 28,660   | 2,614  |
| 836-nucleotide Repeat (Tyba HOR pentamer) | Tyba_array    | 28,809     | 29,822   | 1,014  |
| 361-nucleotide Repeat (Tyba HOR dimer)    | Tyba_array    | 29,964     | 33,250   | 3,287  |
|                                           |               | 33,701     | 38,275   | 4,575  |

|                                            |            |        |        |       |
|--------------------------------------------|------------|--------|--------|-------|
| 827-nucleotide Repeat (Tyba HOR pentamer)  | Tyba_array | 38,716 | 40,380 | 1,665 |
| <hr/>                                      |            |        |        |       |
| Total length (kb) obtained in the assembly |            |        |        | 89    |
| Total length (kb) obtained by PFGE         |            |        |        | 120   |
| <hr/>                                      |            |        |        |       |

**Table S3.** Species name and collecting places

| Species name                                 | Collected places               |
|----------------------------------------------|--------------------------------|
| <i>Rhynchospora pubera</i> (Vahl) Boeckler   | Curado, Recife, Brazil         |
| <i>Rhynchospora tenuis</i> Willd. ex Link    | Curado, Recife, Brazil         |
| <i>Rhynchospora ciliata</i> (Vahl) Kükenthal | Curado, Recife, Brazil         |
| <i>Carex flacca</i> Schreb.                  | Gatersleben, Germany           |
| <i>Cyperus aggregatus</i> (Willd.) Endl.     | Curado, Recife, Brazil         |
| <i>Scleria bracteata</i> Cav.                | Dois Irmãos, Recife,<br>Brazil |
| <i>Scirpoides holoschoenus</i> (L.) Soják    | Gatersleben, Germany           |

**Table S4.** List of oligonucleotide probes and primer sequences used

| Target            | oligo/primer name | oligo/primer sequence                              | fluorescence |
|-------------------|-------------------|----------------------------------------------------|--------------|
| Tyba1             | Tyba1 oligo probe | ATTGGATTATACATGGTAATTACGCATATAAAGTGCAAATAATGCAATTC | FAM          |
| Tyba2             | Tyba2 oligo probe | ACAGATTCTGAGTATATTTGAGCATTTCAAGCGATTTTGCATT        | Cy3          |
| MITE              | MITE oligo probe  | AATTTATTATAAACAATCCAAACTCTTCACAAAGTTACACACTTCCCAAT | FAM          |
| Tyba primer1      | Tyba1F            | CTAAGTCATTTTCATCACAATAATCTAC                       | none         |
|                   | Tyba1R            | AATCCAGAAACGATTGAAATGCTC                           | none         |
| Tyba primer2      | Tyba2F            | GTGCAAATAATGCAATTCTGAGCATC                         | none         |
|                   | Tyba2R            | ATATGCGTAATTACCATGTATAATCC                         | none         |
| RpCENH3           | RpCENH3F          | CTCCCTTTCTCACTCCTTGC                               | none         |
|                   | RpCENH3R          | CGATCAAATTGAACCGCAACCAT                            | none         |
| CRRh-1            | CRRh-1F           | GACTAATCATCCCAGCCATGT                              | none         |
|                   | CRRh-1R           | GTGGCTCGAACGGTGTC                                  | none         |
| CRRh-2            | CRRh-2F           | TATTTTACTTTTGTGCACGGTAGAC                          | none         |
|                   | CRRh-2R           | GTAAAGCCCATGTTATGTTTCG                             | none         |
| control primers   |                   |                                                    |              |
| GAPDH             | GAPDH-F           | CAATGATAGCTGCACCACCAACTG                           | none         |
|                   | GAPDH-R           | CTAGCTGCCCTTCCACCTCTCCA                            | none         |
| 26S ribosomal RNA | 26S-F             | CCTCCGAAGTTTCCCTCAG                                | none         |
|                   | 26s-R             | GCCTCTAATCATTGGCTTTACCT                            | none         |

**Table S5.** Summary of Velvet assembly from the cDNA library of the pollen mother cell transcriptome of *R. pubera*

| <b>Statistics</b>        | <b>All Contigs</b> | <b>Contigs &gt;=100<br/>bp</b> | <b>Contigs &gt;=1000<br/>bp</b> |
|--------------------------|--------------------|--------------------------------|---------------------------------|
| Number of contigs        | 75.353             | 74.120                         | 20.290                          |
| Min Length (bp)          | 62                 | 100                            | 1.000                           |
| Median Length (bp)       | 491                | 502                            | 1.594                           |
| Mean Length (bp)         | 794                | 806                            | 1.847                           |
| Max Length (bp)          | 15.473             | 15.473                         | 15.473                          |
| N50 Length (bp)          | 1.341              | 1.344                          | 1.908                           |
| Number of contigs >= N50 | 13.783             | 13.747                         | 6.770                           |
| Length Sum (bp)          | 59.848.133         | 59.751.873                     | 37.478.675                      |

**Table S6.** List of sequence identifiers and description of plant CENH3 sequences used

| Sequence identifier | Database | Description                                                                                                                         |
|---------------------|----------|-------------------------------------------------------------------------------------------------------------------------------------|
| KR029618            | Genbank  | >Rhynchospora pubera CENH3_1                                                                                                        |
| KR029619            | Genbank  | >Rhynchospora pubera CENH3_2                                                                                                        |
| AF465801            | Genbank  | >gi 19338703 gb AF465801.1  Arabidopsis arenosa centromeric histone H3 HTR12 (HTR11) gene, complete cds                             |
| AB081501            | Genbank  | >gi 33146135 dbj AB081501.1  Arabidopsis halleri subsp. gemmifera gene for histone H3 like protein, complete cds, histone H2 like-a |
| AB081503            | Genbank  | >gi 33146139 dbj AB081503.1  Arabidopsis halleri subsp. gemmifera gene for histone H3 like protein, complete cds, histone H2 like-b |
| DQ450587            | Genbank  | >gi 91179111 gb DQ450587.1  Arabidopsis lyrata subsp. petraea strain Mt. Esja11 histone H3 (HTR11A) gene, complete cds              |
| DQ450557            | Genbank  | >gi 91178276 gb DQ450557.1  Arabidopsis lyrata subsp. petraea strain Mt. Esja11 histone H3 (HTR11B) gene, complete cds              |
| AB081500            | Genbank  | >gi 33146133 dbj AB081500.1  Arabidopsis thaliana mRNA for histone H2 like protein, complete cds                                    |
| AB299169            | Genbank  | >gi 134152506 dbj AB299169.1  Arabis hirsuta cenp-A gene for putative centromeric histone H3-like protein_0, complete cds           |
| GU166738            | Genbank  | >gi 268376515 gb GU166738.1  Brassica nigra isolate BrCENH3-2 centromere-specific H3 variant protein (CENH2) mRNA, complete cds     |
| GU166739            | Genbank  | >gi 268376517 gb GU166739.1  Brassica oleracea isolate BrCENH3-3 centromere-specific H3 variant protein (CENH2) mRNA, complete cds  |
| GU166737            | Genbank  | >gi 268376513 gb GU166737.1  Brassica rapa isolate BrCENH3-1 centromere-specific H3 variant protein (CENH2) mRNA, complete cds      |
| AB299175            | Genbank  | >gi 134152518 dbj AB299175.1  Capsella bursa-pastoris cenp-A gene for centromeric histone H3-like protein-0, complete cds           |
| XM_00630418         | Genbank  | >gi 565493209 ref XM_006304182.1  Capsella rubella hypothetical protein (CARUB_v10010435mg) mRNA,                                   |

---

|               |          |                                                                                                                                                         |
|---------------|----------|---------------------------------------------------------------------------------------------------------------------------------------------------------|
| 2             |          | complete cds                                                                                                                                            |
| AB299171      | Genbank  | >gi 134152510 dbj AB299171.1  Cardamine flexuosa cenp-A gene for centromeric histone H3-like protein-0, complete cds                                    |
| AY612790      | Genbank  | >gi 51103316 gb AY612790.1  Crucihimalaya himalaica centromeric histone (HTR11) gene, complete cds                                                      |
| AB299177      | Genbank  | >gi 134152522 dbj AB299177.1  Crucihimalaya wallichii cenp-A gene for centromeric histone H2-like protein, complete cds                                 |
| AB299180      | Genbank  | >gi 134152528 dbj AB299180.1  Eruca sativa cenp-A gene for centromeric histone H3-like protein-0, complete cds                                          |
| AB299181      | Genbank  | >gi 134152530 dbj AB299181.1  Lepidium virginicum cenp-A gene for centromeric histone H3-like protein_0, complete cds                                   |
| AB299167      | Genbank  | >gi 134152502 dbj AB299167.1  Olimarabidopsis pumila cenp-A gene for putative centromeric histone H3-like protein_0, complete cds                       |
| AB299183      | Genbank  | >gi 134152534 dbj AB299183.1  Raphanus sativus cenp-A gene for centromeric histone H3-like protein_0, complete cds                                      |
| Thhalv100088  | Phytozom | >Thhalv10008888m                                                                                                                                        |
| 89m           | e        |                                                                                                                                                         |
| AB081505      | Genbank  | >gi 33146143 dbj AB081505.1  Turritis glabra gene for histone H2 like protein, complete cds                                                             |
| AB649144      | Genbank  | >gi 365799494 dbj AB649144.1  Astragalus sinicus AsCENH3 mRNA for centromere specific histone H2 variant, complete cds                                  |
| EX259948      | Genbank  | >gi 186738465 gb EX259948.1 EX259948 1440421_5_E19_076 PY05 Carica papaya cDNA, mRNA sequence                                                           |
| XM_00649118   | Genbank  | >gi 568876356 ref XM_006491184.1  PREDICTED: Citrus sinensis histone H3-like centromeric protein HTR12-like (LOC102614120), transcript variant X1, mRNA |
| 4             |          |                                                                                                                                                         |
| XM_00413961   | Genbank  | >gi 449443791 ref XM_004139613.1  PREDICTED: Cucumis sativus histone H3-like centromeric protein HTR12-like (LOC101210010), mRNA                        |
| 3             |          |                                                                                                                                                         |
| Eucgr.D00189. | Phytozom | >Eucgr.D00189.0                                                                                                                                         |
| 1             | e        |                                                                                                                                                         |
| XM_00430663   | Genbank  | >gi 470141951 ref XM_004306639.1  PREDICTED: Fragaria vesca subsp. vesca histone H3-like centromeric protein HTR12-like (LOC101294589), mRNA            |
| 9             |          |                                                                                                                                                         |

---

---

|                        |           |                                                                                                                                                         |
|------------------------|-----------|---------------------------------------------------------------------------------------------------------------------------------------------------------|
| XM_00352875<br>1       | Genbank   | >gi 571465058 ref XM_003528751.2  PREDICTED: Glycine max histone H3-like centromeric protein HTR12-like (LOC100811871), mRNA                            |
| Gorai.001G15<br>5600.1 | Phytozome | >Gorai.001G155600.0                                                                                                                                     |
| Lus10008119            | Phytozome | >Lus10008118                                                                                                                                            |
| BT137822               | Genbank   | >gi 388499101 gb BT137822.1  Lotus japonicus clone JCVI-FLLj-13P8 unknown mRNA                                                                          |
| XP_00836191<br>9.1     | Genbank   | >gi 657953278 ref XP_008361919.1  PREDICTED: histone H3-like centromeric protein cnp0 [Malus domestica]                                                 |
| FF379687               | Genbank   | >gi 182383948 gb FF379687.1 FF379687 CASL069TF CASL Manihot esculenta cDNA 4', mRNA sequence                                                            |
| XM_00363768<br>5       | Genbank   | >gi 358347374 ref XM_003637685.1  Medicago truncatula Histone H3 (MTR_100s0022) mRNA, complete cds                                                      |
| KC491791               | Genbank   | >gi 523371675 gb KC491791.1  Phaseolus vulgaris centromere specific histone H3 variant (CENH2) mRNA, complete cds                                       |
| JF739989               | Genbank   | >gi 371486399 gb JF739989.1  Pisum sativum centromere-specific variant of histone H3 type 0 gene, complete cds                                          |
| JF739990               | Genbank   | >gi 371486401 gb JF739990.1  Pisum sativum centromere-specific variant of histone H3 type 1 gene, complete cds                                          |
| XM_00232081<br>8       | Genbank   | >gi 224130507 ref XM_002320818.1  Populus trichocarpa centromeric histone H3 HTR12 family protein (POPTR_0014s09209g) mRNA, complete cds                |
| XM_00705153<br>1       | Genbank   | >gi 590721367 ref XM_007051531.1  Theobroma cacao Histone superfamily protein, putative isoform 1 (TCM_005175) mRNA, complete cds                       |
| XM_00228103<br>7       | Genbank   | >gi 731421864 ref XM_002281037.2  PREDICTED: Vitis vinifera histone H3-like centromeric protein HTR12 (LOC100260234), transcript variant X1, mRNA       |
| GR117778               | Genbank   | >gi 238366551 gb GR117778.1 GR117778 CCBG8245.g1 CCBG Mimulus guttatus IM62 floral buds (H+L) Erythranthe guttata cDNA clone CCBG8245 2', mRNA sequence |
| AB467328               | Genbank   | >gi 218744595 dbj AB467328.1  Nicotiana glauca NsCENH3 mRNA for centromere specific histone H2 variant, complete cds                                    |
| AB467329               | Genbank   | >gi 218744597 dbj AB467329.1  Nicotiana tomentosiformis NtoCENH3 mRNA for centromere specific histone H2                                                |

---



---

|                  |         |                                                                                                                                          |
|------------------|---------|------------------------------------------------------------------------------------------------------------------------------------------|
|                  |         | variant, complete cds                                                                                                                    |
| BG127218         | Genbank | >gi 12627406 gb BG127218.1 BG127218 EST472864 tomato shoot/meristem Solanum lycopersicum cDNA clone cTOF14D12 4' sequence, mRNA sequence |
| XM_00633962<br>5 | Genbank | >gi 565345203 ref XM_006339625.1  PREDICTED: Solanum tuberosum histone H3-like centromeric protein HTR12-like (LOC102603326), mRNA       |
| AB600275         | Genbank | >gi 371940020 dbj AB600275.1  Allium cepa AceCENH3 mRNA for centromere specific histone H2 variant, complete cds                         |
| AB571555         | Genbank | >gi 371940014 dbj AB571555.1  Allium fistulosum AfiCENH3 mRNA for centromere specific histone H2 variant, complete cds                   |
| AB571556         | Genbank | >gi 371940016 dbj AB571556.1  Allium sativum AsaCENH3 mRNA for centromere specific histone H2 variant, complete cds                      |
| AB571557         | Genbank | >gi 371940018 dbj AB571557.1  Allium tuberosum AtuCENH3 mRNA for centromere specific histone H2 variant, complete cds                    |
| XM_00356605<br>9 | Genbank | >gi 357128898 ref XM_003566059.1  PREDICTED: Brachypodium distachyon uncharacterized LOC100830307 (LOC100830306), mRNA                   |
| GU245882         | Genbank | >gi 282895619 gb GU245882.1  Hordeum bulbosum centromeric histone H3 (CENH2) mRNA, partial cds                                           |
| JF419330         | Genbank | >gi 339836913 gb JF419330.1  Hordeum bulbosum beta centromeric histone H3 (CENH2) mRNA, complete cds                                     |
| JF419328         | Genbank | >gi 339836909 gb JF419328.1  Hordeum vulgare subsp. vulgare alpha centromeric histone H3 (CENH2) mRNA, partial cds                       |
| JF419329         | Genbank | >gi 339836911 gb JF419329.1  Hordeum vulgare subsp. vulgare beta centromeric histone H3 (CENH2) mRNA, complete cds                       |
| AB201356         | Genbank | >gi 90652790 dbj AB201356.2  Luzula nivea LnCENH3 mRNA for centromere specific histone H2 variant, complete cds                          |
| HM988988         | Genbank | >gi 304277059 gb HM988988.1  Luzula nivea centromeric histone H3 isoform B (CENH2-B) mRNA, complete cds                                  |
| AY438639         | Genbank | >gi 40365139 gb AY438639.1  Oryza sativa (japonica cultivar-group) centromeric histone 3 (CenH2) mRNA, complete cds                      |
| FL730019         | Genbank | >gi 197988596 gb FL730019.1 FL730019 CCGB10819.g1 CCGB Panicum virgatum apex + stem (L) Panicum                                          |

---

---

|                    |         |                                                                                                                                                          |
|--------------------|---------|----------------------------------------------------------------------------------------------------------------------------------------------------------|
|                    |         | virgatum cDNA clone CCGB10819 2', mRNA sequence                                                                                                          |
| CA127217           | Genbank | >gi 35006880 gb CA127217.1 CA127217 SCCCLR2004A05.g LR2 Saccharum hybrid cultivar SP80-3280 cDNA clone SCCCLR2004A05 4', mRNA sequence                   |
| XM_00496162<br>5   | Genbank | >gi 514748700 ref XM_004961625.1  PREDICTED: Setaria italica histone H3-like centromeric protein HTR12-like (LOC101784681), transcript variant X1, mRNA  |
| XM_00244124<br>5   | Genbank | >gi 242090914 ref XM_002441245.0  Sorghum bicolor hypothetical protein, mRNA                                                                             |
| NM_00111205<br>0   | Genbank | >gi 162460347 ref NM_001112050.1  Zea mays centromeric histone H3 (cenH2), mRNA                                                                          |
| AEH95350.1         | Genbank | >gi 336041546 gb AEH95350.1  centromeric histone 3 [Triticum aestivum]                                                                                   |
| AEH95351.1         | Genbank | >gi 336041548 gb AEH95351.1  centromeric histone 3 [Triticum aestivum]                                                                                   |
| ACZ04985.1         | Genbank | >gi 268376530 gb ACZ04985.1  centromere-specific H3 variant protein [Brassica napus]                                                                     |
| ACZ04980.1         | Genbank | >gi 268376520 gb ACZ04980.1  centromere-specific H3 variant protein [Brassica juncea]                                                                    |
| ACZ04982.1         | Genbank | >gi 268376524 gb ACZ04982.1  centromere-specific H3 variant protein [Brassica carinata]                                                                  |
| KJ201906.1         | Genbank | >gi 656991661 gb KJ201906.1  Daucus glochidiatus centromeric histone H3 (CENH3) mRNA, partial cds                                                        |
| AHW98233.1         | Genbank | >gi 612176255 gb AHW98233.1  centromeric histone 3, partial [Cicer reticulatum]                                                                          |
| XM_00934694<br>4.1 | Genbank | >gi 694436201 ref XM_009346944.1  PREDICTED: Pyrus x bretschneideri histone H3-like centromeric protein cnp1 (LOC103937036), transcript variant X2, mRNA |
| XM_00823498<br>0.1 | Genbank | >gi 645254791 ref XM_008234980.1  PREDICTED: Prunus mume histone H3-like centromeric protein HTR12 (LOC103332255), mRNA                                  |
| XM_01048204<br>0.1 | Genbank | >gi 727429465 ref XM_010482040.1  PREDICTED: Camelina sativa histone H3-like centromeric protein HTR12 (LOC104759068), transcript variant X1, mRNA       |
| XM_01048204<br>7.1 | Genbank | >gi 727429467 ref XM_010482047.1  PREDICTED: Camelina sativa histone H3-like centromeric protein HTR12 (LOC104759068), transcript variant X2, mRNA       |
| KJ507236.1         | Genbank | >gi 612176248 gb KJ507236.1  Cajanus scarabaeoides isolate Pigeonpea_ICP 15731 centromeric histone 3 (CenH3) mRNA, partial cds                           |
| XM_01055829        | Genbank | >gi 729412033 ref XM_010558290.1  PREDICTED: Tarenaya hassleriana histone H3-like centromeric protein                                                    |

---

---

|             |         |                                                                                                                                |
|-------------|---------|--------------------------------------------------------------------------------------------------------------------------------|
| 0.1         |         | HTR12 (LOC104825875), transcript variant X2, mRNA                                                                              |
| XM_01055828 | Genbank | >gi 729412030 ref XM_010558289.1  PREDICTED: Tarenaya hassleriana histone H3-like centromeric protein                          |
| 9.1         |         | HTR12 (LOC104825875), transcript variant X1, mRNA                                                                              |
| KJ507233.1  | Genbank | >gi 612176242 gb KJ507233.1  Cajanus cajan isolate Pigeonpea_ICPL 87119_Asha centromeric histone 3 (CenH3) mRNA, complete cds  |
| KJ507235.1  | Genbank | >gi 612176246 gb KJ507235.1  Cajanus cajanifolius isolate Pigeonpea_ICP 15631 centromeric histone 3 (CenH3) mRNA, complete cds |
| XM_00641835 | Genbank | >gi 567156644 ref XM_006418354.1  Eutrema salsugineum hypothetical protein (EUTSA_v10008889mg) mRNA, complete cds              |
| 4.1         |         |                                                                                                                                |
| XM_01103962 | Genbank | >gi 743790056 ref XM_011039624.1  PREDICTED: Populus euphratica histone H3-like centromeric protein HTR12                      |
| 4.1         |         | (LOC105134977), mRNA                                                                                                           |
| AB793503.1  | Genbank | >gi 586941098 dbj AB793503.1  Torenia fournieri TfcCENH3 mRNA for centromere specific histone H3, complete cds                 |
| AB793504.1  | Genbank | >gi 586941100 dbj AB793504.1  Torenia baillonii TbCENH3 mRNA for centromere specific histone H3, complete cds                  |
| XM_01109474 | Genbank | >gi 747090693 ref XM_011094744.1  PREDICTED: Sesamum indicum histone H3-like centromeric protein HTR12                         |
| 4.1         |         | (LOC105173094), mRNA                                                                                                           |
| XM_01026321 | Genbank | >gi 720017605 ref XM_010263215.1  PREDICTED: Nelumbo nucifera histone H3-like centromeric protein HTR12                        |
| 5.1         |         | (LOC104600331), transcript variant X2, mRNA                                                                                    |
| XM_01026816 | Genbank | >gi 720033563 ref XM_010268168.1  PREDICTED: Nelumbo nucifera histone H3-like centromeric protein HTR12                        |
| 8.1         |         | (LOC104603975), transcript variant X1, mRNA                                                                                    |
| KJ201904.1  | Genbank | >gi 656991657 gb KJ201904.1  Daucus muricatus centromeric histone H3 (CENH3) mRNA, partial cds                                 |
| KJ201903.1  | Genbank | >gi 656991655 gb KJ201903.1  Daucus carota centromeric histone H3 (CENH3) mRNA, partial cds                                    |
| KJ201905.1  | Genbank | >gi 656991659 gb KJ201905.1  Daucus pusillus centromeric histone H3 (CENH3) mRNA, partial cds                                  |
| XM_01069639 | Genbank | >gi 731365747 ref XM_010696392.1  PREDICTED: Beta vulgaris subsp. vulgaris histone H3 (LOC104907459), mRNA                     |
| 2.1         |         |                                                                                                                                |
| KJ507243.1  | Genbank | >gi 612176262 gb KJ507243.1  Cicer yamashitae isolate Chickpea_ICC 17117 centromeric histone 3 (CenH3)                         |

---

---

|             |         |                                                                                                                                                 |
|-------------|---------|-------------------------------------------------------------------------------------------------------------------------------------------------|
|             |         | mRNA, complete cds                                                                                                                              |
| XM_00879423 | Genbank | >gi 672137449 ref XM_008794232.1  PREDICTED: Phoenix dactylifera histone H3-like (LOC103709056), mRNA<br>2.1                                    |
| HQ123579.1  | Genbank | >gi 313104721 gb HQ123579.1  Oryza latifolia isolate DD centromeric histone 3 (CenH3) mRNA, complete cds                                        |
| XM_00941351 | Genbank | >gi 260072772 gb GQ849341.1  Oryza australiensis isolate EE CENH3 (CenH3) mRNA, complete cds<br>4.1                                             |
| AB649144.1  | Genbank | >gi 695047791 ref XM_009413514.1  PREDICTED: Musa acuminata subsp. malaccensis histone H3-like<br>centromeric protein cnp1 (LOC103993441), mRNA |
| XM_01093319 | Genbank | >gi 743819355 ref XM_010933196.1  PREDICTED: Elaeis guineensis histone H3.3 type c-like (LOC105052399),<br>6.1 transcript variant X1, mRNA      |
| XM_01093319 | Genbank | gi 743819358 ref XM_010933197.1  PREDICTED: Elaeis guineensis histone H3.3 type c-like (LOC105052399),<br>7.1 transcript variant X2, mRNA       |
| AB770163.1  | Genbank | >gi 670453236 dbj AB770163.1  Cenchrus americanus CENH3 mRNA for centromeric histone H3 isoform a,<br>complete cds                              |
| AB770164.1  | Genbank | >gi 670453238 dbj AB770164.1  Cenchrus americanus CENH3 mRNA for centromeric histone H3 isoform b,<br>complete cds                              |
| AB981585.1  | Genbank | >gi 745991781 dbj AB981585.1  Avena sativa AsCENH3-2 mRNA for centromere specific histone H3, partial cds                                       |
| AB981584.1  | Genbank | >gi 745991779 dbj AB981584.1  Avena sativa AsCENH3-1 mRNA for centromere specific histone H3, partial cds                                       |
| XM_00846388 | Genbank | >gi 659124344 ref XM_008463887.1  PREDICTED: Cucumis melo histone H3-like centromeric protein HTR12<br>7.1 (LOC103500538), partial mRNA         |
| XM_01010129 | Genbank | >gi 703110467 ref XM_010101295.1  Morus notabilis Histone H3-like centromeric protein partial mRNA<br>5.1                                       |
| XM_01023293 | Genbank | >gi 721637023 ref XM_010232934.1  PREDICTED: Brachypodium distachyon histone H3-like (LOC100830307),<br>4.1 mRNA                                |
| XM_00178591 | Genbank | >gi 168068179 ref XM_001785914.1  Physcomitrella patens subsp. patens histone H3 (HTR1515) mRNA, complete<br>4 cds                              |
| XM_00169781 | Genbank | >gi 159479581 ref XM_001697817.1  Chlamydomonas reinhardtii strain CC-503 cw91 mt+                                                              |

---

---

|             |         |                                                                                                                                                |
|-------------|---------|------------------------------------------------------------------------------------------------------------------------------------------------|
| XM_00564732 | Genbank | >gi 545364669 ref XM_005647320.1  Coccomyxa subellipsoidea C-169 histone-fold-containing protein<br>0<br>(COCSUDRAFT_24063) mRNA, complete cds |
| XM_00305646 | Genbank | >gi 303274379 ref XM_003056465.1  Micromonas pusilla CCMP1545 histone H2, mRNA<br>5                                                            |
| NM_001809.3 | Genbank | >gi 109637780 ref NM_001809.3  Homo sapiens centromere protein A (CENPA), transcript variant 0, mRNA                                           |
| AF093633.1  | Genbank | >gi 3885889 gb AF093633.1  Oryza sativa histone H2 mRNA, complete cds                                                                          |
| NM_125934.2 | Genbank | >gi 30698117 ref NM_125934.2  Arabidopsis thaliana histone H3.0 mRNA, complete cds                                                             |
| X57128.1    | Genbank | >gi 31981 emb X57128.1  H.sapiens H3.1 gene for H2 histone                                                                                     |

---

## SI References

1. Ruban A, *et al.* (2014) B chromosomes of *Aegilops speltoides* are enriched in organelle genome-derived sequences. *PLoS one* 9(2):e90214.
2. Marques A, *et al.* (2011) Characterization of eu- and heterochromatin of *Citrus* with a focus on the condensation behavior of 45S rDNA chromatin. *Cytogenetic and genome research* 134(1):72-82.
3. Kato A, Albert PS, Vega JM, & Birchler JA (2006) Sensitive fluorescence *in situ* hybridization signal detection in maize using directly labeled probes produced by high concentration DNA polymerase nick translation. *Biotechnic & histochemistry : official publication of the Biological Stain Commission* 81(2-3):71-78.
4. Ma L, *et al.* (2010) Synteny between *Brachypodium distachyon* and *Hordeum vulgare* as revealed by FISH. *Chromosome Research* 18(7):841-850.
5. Banaei-Moghaddam AM, Meier K, Karimi-Ashtiyani R, & Houben A (2013) Formation and expression of pseudogenes on the B chromosome of rye. *The Plant cell* 25(7):2536-2544.
6. Zerbino DR & Birney E (2008) Velvet: algorithms for de novo short read assembly using de Bruijn graphs. *Genome research* 18(5):821-829.
7. Kears M, *et al.* (2012) Geneious Basic: an integrated and extendable desktop software platform for the organization and analysis of sequence data. *Bioinformatics* 28(12):1647-1649.
8. Li L, Yang J, Tong Q, Zhao L, & Song Y (2005) A novel approach to prepare extended DNA fibers in plants. *Cytometry. Part A : the journal of the International Society for Analytical Cytology* 63(2):114-117.
9. Galbraith DW, *et al.* (1983) Rapid flow cytometric analysis of the cell cycle in intact plant tissues. *Science* 220(4601):1049-1051.

10. Arumuganathan K, Slattery JP, Tanksley SD, & Earle ED (1991) Preparation and flow cytometric analysis of metaphase chromosomes of tomato. *Theoretical and Applied Genetics* 82(1):101-111.
11. Ishii T, Sunamura N, Matsumoto A, Eltayeb AE, & Tsujimoto H (2015) Preferential recruitment of the maternal centromere-specific histone H3 (CENH3) in oat (*Avena sativa* L.) x pearl millet (*Pennisetum glaucum* L.) hybrid embryos. *Chromosome Research*.
12. Doležel J, Binarova P, & Lucretti S (1989) Analysis of nuclear DNA content in plant cells by flow-cytometry. *Biologia Plantarum* 31(2):113-120.
13. Sambrook J, Fritsch EF, & Maniatis T (1989) Analysis of genomic DNA by southern hybridization and northern hybridization. *Molecular Cloning: A Laboratory Manual*, (Cold Spring Harbor Press: Cold Spring Harbor, NY, USA), 2nd Ed, pp E21–E25.
14. Doležel J, Číhalíková J, & Lucretti S (1992) A high-yield procedure for isolation of metaphase chromosomes from root tips of *Vicia faba* L. *Planta* 188(1):93-98.
15. Šimková H, Číhalíková J, Vrána J, Lysák MA, & Doležel J (2003) Preparation of HMW DNA from plant nuclei and chromosomes isolated from root tips. *Biologia Plantarum* 46(3):369-373.
16. Šimková H, et al. (2011) BAC libraries from wheat chromosome 7D: efficient tool for positional cloning of aphid resistance genes. *Journal of biomedicine & biotechnology* 2011:302543.
17. Ming R, et al. (2001) Construction and characterization of a papaya BAC library as a foundation for molecular dissection of a tree-fruit genome. *Theoretical and Applied Genetics* 102:892-899.
18. Meyer M & Kircher M (2010) Illumina sequencing library preparation for highly multiplexed target capture and sequencing. *Cold Spring Harbor protocols* 2010(6):pdb prot5448.
19. Novak P, Neumann P, & Macas J (2010) Graph-based clustering and characterization of repetitive sequences in next-generation sequencing data. *BMC bioinformatics* 11:378.
20. Novak P, Neumann P, Pech J, Steinhaisl J, & Macas J (2013) RepeatExplorer: a Galaxy-based web server for genome-wide characterization of eukaryotic repetitive elements from next-generation sequence reads. *Bioinformatics* 29(6):792-793.
21. Macas J, Neumann P, Novak P, & Jiang J (2010) Global sequence characterization of rice centromeric satellite based on oligomer frequency analysis in large-scale sequencing data. *Bioinformatics* 26(17):2101-2108.
22. Altschul SF, et al. (1997) Gapped BLAST and PSI-BLAST: a new generation of protein database search programs. *Nucleic acids research* 25(17):3389-3402.
23. Kuhlmann M & Mette MF (2012) Developmentally non-redundant SET domain proteins SUVH2 and SUVH9 are required for transcriptional gene silencing in *Arabidopsis thaliana*. *Plant Mol Biol* 79(6):623-633.
24. Chevreur B, Wetter T, & Suhai S (1999) Genome sequence assembly using trace signals and additional sequence information. *Computer Science and Biology: Proceedings of the German Conference on Bioinformatics* 99:45-56.
25. Edgar RC (2004) MUSCLE: a multiple sequence alignment method with reduced time and space complexity. *BMC bioinformatics* 5:113.
26. Nguyen LT, Schmidt HA, von Haeseler A, & Minh BQ (2015) IQ-TREE: a fast and effective stochastic algorithm for estimating maximum-likelihood phylogenies. *Molecular biology and evolution* 32(1):268-274.
27. Minh BQ, Nguyen MA, & von Haeseler A (2013) Ultrafast approximation for phylogenetic bootstrap. *Molecular biology and evolution* 30(5):1188-1195.
28. Neumann P, et al. (2011) Plant centromeric retrotransposons: a structural and cytogenetic perspective. *Mobile DNA* 2(1):4.
